# Supplementary material for: COVID-19 transmission: a rapid systematic review of current knowledge
Source: PubMed Central journal article supplement — Osong Public Health Res Perspect. 2021 Apr 29;12(2):54–63. doi: 10.24171/j.phrp.2021.12.2.02 (PMC8102883; doi:10.24171/j.phrp.2021.12.2.02), 2021-04-29
Supplement: j-phrp-2021-12-2-02-suppl1.pdf [file j-phrp-2021-12-2-02-suppl1.pdf]

**Table S1.** Risk of bias for cohort studies

| First author     | Type          | Representativeness of the exposed cohort | Selection of the non-exposed cohort | Ascertainment of exposure | Demonstration that outcome of interest was not present at start of the study | Comparability of cohorts on the basis of the design or analysis | Assessment of outcome of outcome | Was follow-up long enough for outcomes to occur | Adequacy of follow-up of Total cohorts |
|------------------|---------------|------------------------------------------|-------------------------------------|---------------------------|------------------------------------------------------------------------------|-----------------------------------------------------------------|----------------------------------|-------------------------------------------------|----------------------------------------|
| Ghinai I         | Prospective   | *                                        | *                                   | *                         | -                                                                            | -                                                               | *                                | *                                               | 6/9                                    |
| Wang X           | Retrospective | -                                        | *                                   | *                         | -                                                                            | -                                                               | *                                | *                                               | 5/9                                    |
| Kimball A        | Prospective   | -                                        | *                                   | *                         | -                                                                            | -                                                               | *                                | *                                               | 5/9                                    |
| Li YK            | Retrospective | -                                        | *                                   | *                         | -                                                                            | **                                                              | *                                | *                                               | 7/9                                    |
| Zhong Q          | Retrospective | -                                        | *                                   | *                         | *                                                                            | -                                                               | *                                | *                                               | 6/9                                    |
| Zhang L          | Retrospective | -                                        | *                                   | *                         | -                                                                            | **                                                              | *                                | *                                               | 7/9                                    |
| Zhou Y           | Retrospective | -                                        | *                                   | *                         | -                                                                            | -                                                               | *                                | *                                               | 5/9                                    |
| Li Q             | Prospective   | *                                        | *                                   | *                         | -                                                                            | -                                                               | *                                | *                                               | 6/9                                    |
| Ling Y           | Retrospective | *                                        | *                                   | *                         | *                                                                            | -                                                               | *                                | *                                               | 6/9                                    |
| Li D             | Prospective   | *                                        | *                                   | *                         | *                                                                            | -                                                               | -                                | -                                               | 4/9                                    |
| Sayampanathan AA | Retrospective | *                                        | -                                   | *                         | *                                                                            | -                                                               | -                                | *                                               | 5/9                                    |
| Kawasuji H       | Retrospective | *                                        | *                                   | *                         | *                                                                            | *                                                               | *                                | *                                               | 8/9                                    |
