# Supplementary material for: COVID-19 transmission: a rapid systematic review of current knowledge
Source: PubMed Central journal article supplement — Osong Public Health Res Perspect. 2021 Apr 29;12(2):54–63. doi: 10.24171/j.phrp.2021.12.2.02 (PMC8102883; doi:10.24171/j.phrp.2021.12.2.02), 2021-04-29
Supplement: j-phrp-2021-12-2-02-suppl2.pdf [file j-phrp-2021-12-2-02-suppl2.pdf]

**Table S2.** Risk of bias for case series

| First author | Were there clear criteria for inclusion in the case series? | Was the condition measured in a standard, reliable way for all participants included in the case series? | Were valid methods used for identification of the condition for all participants included in the case series? | Did the case series have consecutive inclusion of participants? | Did the case series have complete inclusion of participants? | Was there clear reporting of demographics of the participants in the study? | Was there clear reporting of clinical information of the participants? | Were the outcomes or follow-up results of cases clearly reported? | Was there clear reporting of the presenting site(s)/clinic(s) demographic information? | Was statistical analysis appropriate? | Overall quality |
|--------------|-------------------------------------------------------------|----------------------------------------------------------------------------------------------------------|---------------------------------------------------------------------------------------------------------------|-----------------------------------------------------------------|--------------------------------------------------------------|-----------------------------------------------------------------------------|------------------------------------------------------------------------|-------------------------------------------------------------------|----------------------------------------------------------------------------------------|---------------------------------------|-----------------|
| Chen H       | No                                                          | Yes                                                                                                      | Yes                                                                                                           | Unclear                                                         | Unclear                                                      | Yes                                                                         | Yes                                                                    | Yes                                                               | Yes                                                                                    | Yes                                   | Good            |
| Yu P         | Yes                                                         | Yes                                                                                                      | Yes                                                                                                           | Yes                                                             | Yes                                                          | Yes                                                                         | No                                                                     | Yes                                                               | Yes                                                                                    | No                                    | Good            |
| Zeng H       | No                                                          | Yes                                                                                                      | Yes                                                                                                           | Unclear                                                         | Unclear                                                      | No                                                                          | Yes                                                                    | Yes                                                               | No                                                                                     | NA                                    | Fair            |
| Xu Y         | Yes                                                         | Yes                                                                                                      | Yes                                                                                                           | Yes                                                             | Yes                                                          | Yes                                                                         | Yes                                                                    | Yes                                                               | Yes                                                                                    | NA                                    | Good            |
| Xie HT       | Yes                                                         | Yes                                                                                                      | Yes                                                                                                           | Unclear                                                         | Unclear                                                      | Yes                                                                         | Yes                                                                    | Yes                                                               | Yes                                                                                    | NA                                    | Good            |
| Zhu H        | Yes                                                         | Yes                                                                                                      | Yes                                                                                                           | Yes                                                             | Yes                                                          | Yes                                                                         | Yes                                                                    | Yes                                                               | Yes                                                                                    | NA                                    | Good            |
| Chen S       | Yes                                                         | Yes                                                                                                      | Yes                                                                                                           | Yes                                                             | Yes                                                          | Yes                                                                         | Yes                                                                    | Yes                                                               | Yes                                                                                    | NA                                    | Good            |
| Yu N         | Yes                                                         | Yes                                                                                                      | Yes                                                                                                           | Yes                                                             | Yes                                                          | Yes                                                                         | Yes                                                                    | Yes                                                               | Yes                                                                                    | NA                                    | Good            |
| Xia J        | Yes                                                         | Yes                                                                                                      | Yes                                                                                                           | Unclear                                                         | Unclear                                                      | Yes                                                                         | Yes                                                                    | Yes                                                               | Yes                                                                                    | NA                                    | Good            |
| Scott SE     | Yes                                                         | Yes                                                                                                      | Yes                                                                                                           | Yes                                                             | Yes                                                          | Yes                                                                         | Yes                                                                    | Yes                                                               | Yes                                                                                    | NA                                    | Good            |
| Wei M        | Yes                                                         | Yes                                                                                                      | Yes                                                                                                           | Yes                                                             | Yes                                                          | Yes                                                                         | Yes                                                                    | Yes                                                               | Yes                                                                                    | NA                                    | Good            |
| Luo C        | Unclear                                                     | Yes                                                                                                      | Yes                                                                                                           | Unclear                                                         | Unclear                                                      | Yes                                                                         | Yes                                                                    | No                                                                | Yes                                                                                    | NA                                    | Fair            |
| Bai Y        | No                                                          | Unclear                                                                                                  | Unclear                                                                                                       | Unclear                                                         | Unclear                                                      | Yes                                                                         | Yes                                                                    | No                                                                | No                                                                                     | NA                                    | Poor            |
| Santarapia J | Yes                                                         | Yes                                                                                                      | Yes                                                                                                           | Yes                                                             | Yes                                                          | No                                                                          | Yes                                                                    | Yes                                                               | Yes                                                                                    | NA                                    | Good            |
| Zhang T      | Yes                                                         | Yes                                                                                                      | Yes                                                                                                           | Unclear                                                         | Unclear                                                      | Yes                                                                         | Yes                                                                    | Yes                                                               | Yes                                                                                    | NA                                    | Good            |
| Yu J         | Yes                                                         | Yes                                                                                                      | Yes                                                                                                           | Yes                                                             | Yes                                                          | Yes                                                                         | Yes                                                                    | Yes                                                               | Yes                                                                                    | NA                                    | Good            |
| Qian G       | No                                                          | Unclear                                                                                                  | Unclear                                                                                                       | Unclear                                                         | Unclear                                                      | Yes                                                                         | Yes                                                                    | No                                                                | No                                                                                     | NA                                    | Poor            |
| Li P         | No                                                          | Yes                                                                                                      | Yes                                                                                                           | Unclear                                                         | Unclear                                                      | Yes                                                                         | Yes                                                                    | Yes                                                               | No                                                                                     | NA                                    | Fair            |
| Chan JF      | Yes                                                         | Yes                                                                                                      | Yes                                                                                                           | Yes                                                             | Yes                                                          | Yes                                                                         | Yes                                                                    | Yes                                                               | Yes                                                                                    | NA                                    | Good            |
| Yu N         | Yes                                                         | Yes                                                                                                      | Yes                                                                                                           | Yes                                                             | Yes                                                          | Yes                                                                         | Yes                                                                    | Yes                                                               | Yes                                                                                    | NA                                    | Good            |
| Rothe C      | No                                                          | Unclear                                                                                                  | Yes                                                                                                           | Unclear                                                         | Unclear                                                      | Yes                                                                         | Yes                                                                    | Yes                                                               | Yes                                                                                    | NA                                    | Fair            |
| Huang C      | Yes                                                         | Yes                                                                                                      | Yes                                                                                                           | Yes                                                             | Yes                                                          | Yes                                                                         | Yes                                                                    | Yes                                                               | Yes                                                                                    | Yes                                   | Good            |
| Xiao F       | Yes                                                         | Yes                                                                                                      | Yes                                                                                                           | Unclear                                                         | Unclear                                                      | Yes                                                                         | No                                                                     | No                                                                | Yes                                                                                    | NA                                    | Good            |
| He X         | Yes                                                         | Yes                                                                                                      | Yes                                                                                                           | Unclear                                                         | Unclear                                                      | Yes                                                                         | Yes                                                                    | Yes                                                               | Yes                                                                                    | NA                                    | Good            |
| Zhao H       | Yes                                                         | Yes                                                                                                      | Yes                                                                                                           | Yes                                                             | Yes                                                          | Yes                                                                         | No                                                                     | No                                                                | Yes                                                                                    | NA                                    | Good            |
| Lin G        | Yes                                                         | Yes                                                                                                      | Yes                                                                                                           | Yes                                                             | Yes                                                          | Yes                                                                         | Yes                                                                    | Yes                                                               | Yes                                                                                    | NA                                    | Good            |
| Chia PY      | Yes                                                         | Yes                                                                                                      | Yes                                                                                                           | Yes                                                             | Yes                                                          | Yes                                                                         | Yes                                                                    | Yes                                                               | Yes                                                                                    | Yes                                   | Good            |
| Kaya H       | Yes                                                         | Yes                                                                                                      | Yes                                                                                                           | Yes                                                             | Yes                                                          | No                                                                          | Yes                                                                    | No                                                                | Yes                                                                                    | NA                                    | Good            |
