# Supplementary material for: COVID-19 transmission: a rapid systematic review of current knowledge
Source: PubMed Central journal article supplement — Osong Public Health Res Perspect. 2021 Apr 29;12(2):54–63. doi: 10.24171/j.phrp.2021.12.2.02 (PMC8102883; doi:10.24171/j.phrp.2021.12.2.02), 2021-04-29
Supplement: j-phrp-2021-12-2-02-suppl3.pdf [file j-phrp-2021-12-2-02-suppl3.pdf]

**Table S3.** Risk of bias for case reports

| First author   | Documentation | Uniqueness | Educational value | Objectivity | Interpretation | Overall score |
|----------------|---------------|------------|-------------------|-------------|----------------|---------------|
| Wang X         | 2             | 1          | 2                 | 1           | 1              | 7             |
| Liu YC         | 2             | 1          | 2                 | 1           | 2              | 8             |
| Sriwijitalai W | 0             | 2          | 1                 | 1           | 0              | 4             |
| Holshue M      | 2             | 2          | 2                 | 2           | 2              | 10            |
| Pongpirul WA   | 1             | 1          | 1                 | 1           | 1              | 5             |
| Lillie PJ      | 2             | 1          | 1                 | 2           | 1              | 7             |
| Dong L         | 2             | 2          | 2                 | 1           | 1              | 8             |
| Le HT          | 2             | 1          | 2                 | 2           | 2              | 9             |
| Fan C          | 2             | 1          | 1                 | 2           | 1              | 7             |
| Phan LT        | 1             | 2          | 1                 | 1           | 1              | 7             |
| Sun J          | 1             | 2          | 2                 | 1           | 2              | 8             |
